# Supplementary material for: One-step generation of tumor models by base editor multiplexing in adult stem cell-derived organoids
Source: PubMed Central journal article supplement (PMC10435570; doi:10.1038/s41467-023-40701-3), 2023-08-17
Supplement: 41467_2023_40701_MOESM1_ESM.pdf [file 41467_2023_40701_MOESM1_ESM.pdf]

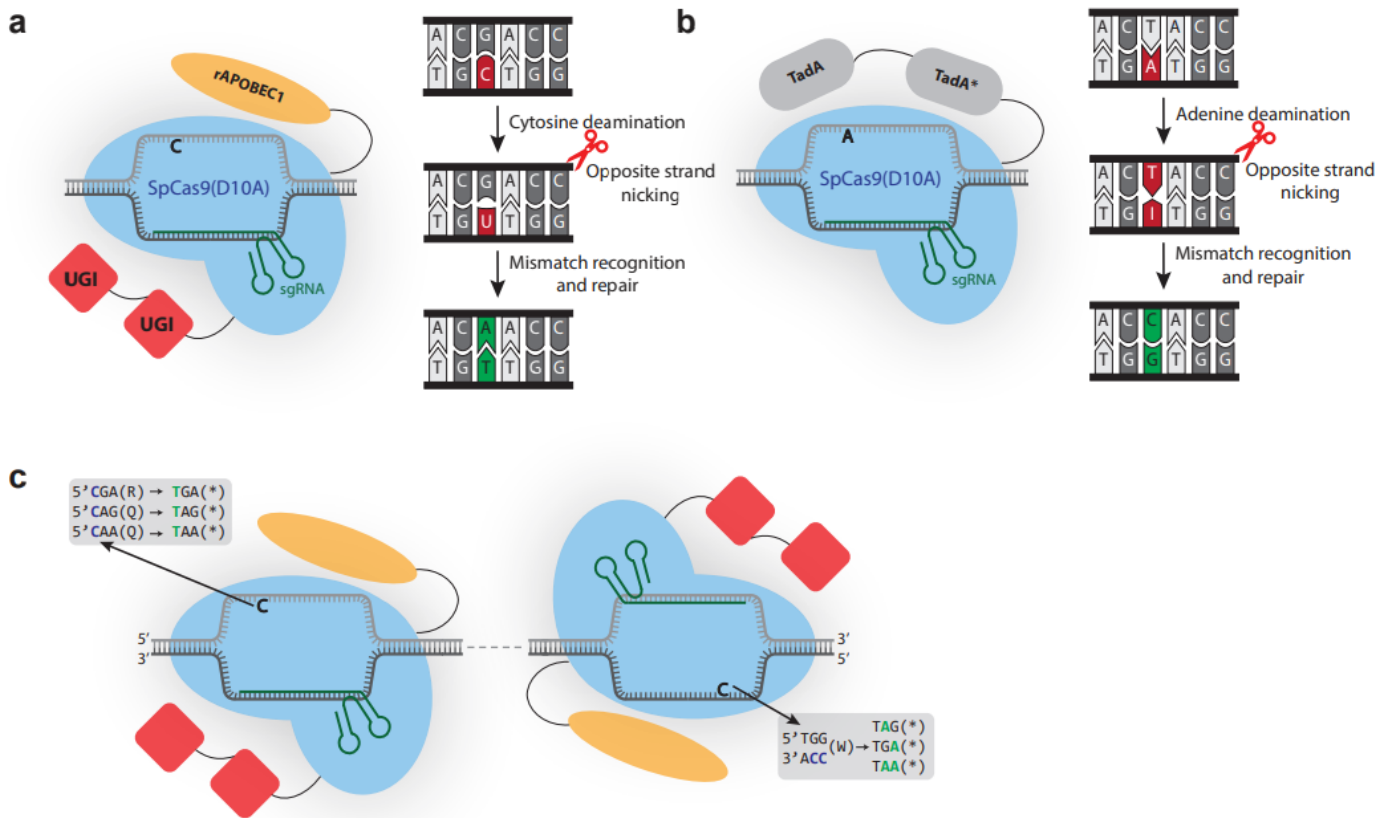

**Supplementary figure 1. Principles of Cytosine base editing, Adenine base editing and CRISPR-STOP adapted from <sup>28, 29</sup> and <sup>46</sup>.**

**(a)** Cytosine base editor consisting of the nickase Cas9 (D10A) fused to the cytidine deaminase rAPOBEC1 and a tandem repeat of Uracyl Glycosylase inhibitors (UGI). Upon target recognition the DNA opens up in an R-loop upon which the rAPOBEC deaminates Cytosines turning them into Uracil. Uracil is converted to Thymine by nicking the opposite strand to guide DNA repair towards correct C>T editing <sup>28</sup>. **(b)** Adenine base editor consisting of the nickase Cas9 (D10A) fused to a heterodimer of the adenine deaminase TadA. Upon target recognition the DNA opens up in an R-loop upon which TadA deaminates adenines turning them into Inosine. This Inosine residue is converted to Guanine by nicking the opposite strand to guide DNA repair towards correct A>G editing <sup>29</sup>. **(c)** Schematic representation of the CRISPR-stop technique. Arginine (R) and Glutamine (Q) residues can be converted into STOP codons on the sense DNA strand whereas Tryptophan (W) residues can be converted into STOP codons on the anti-sense strand. This will result in knock-out via nonsense mediated decay.

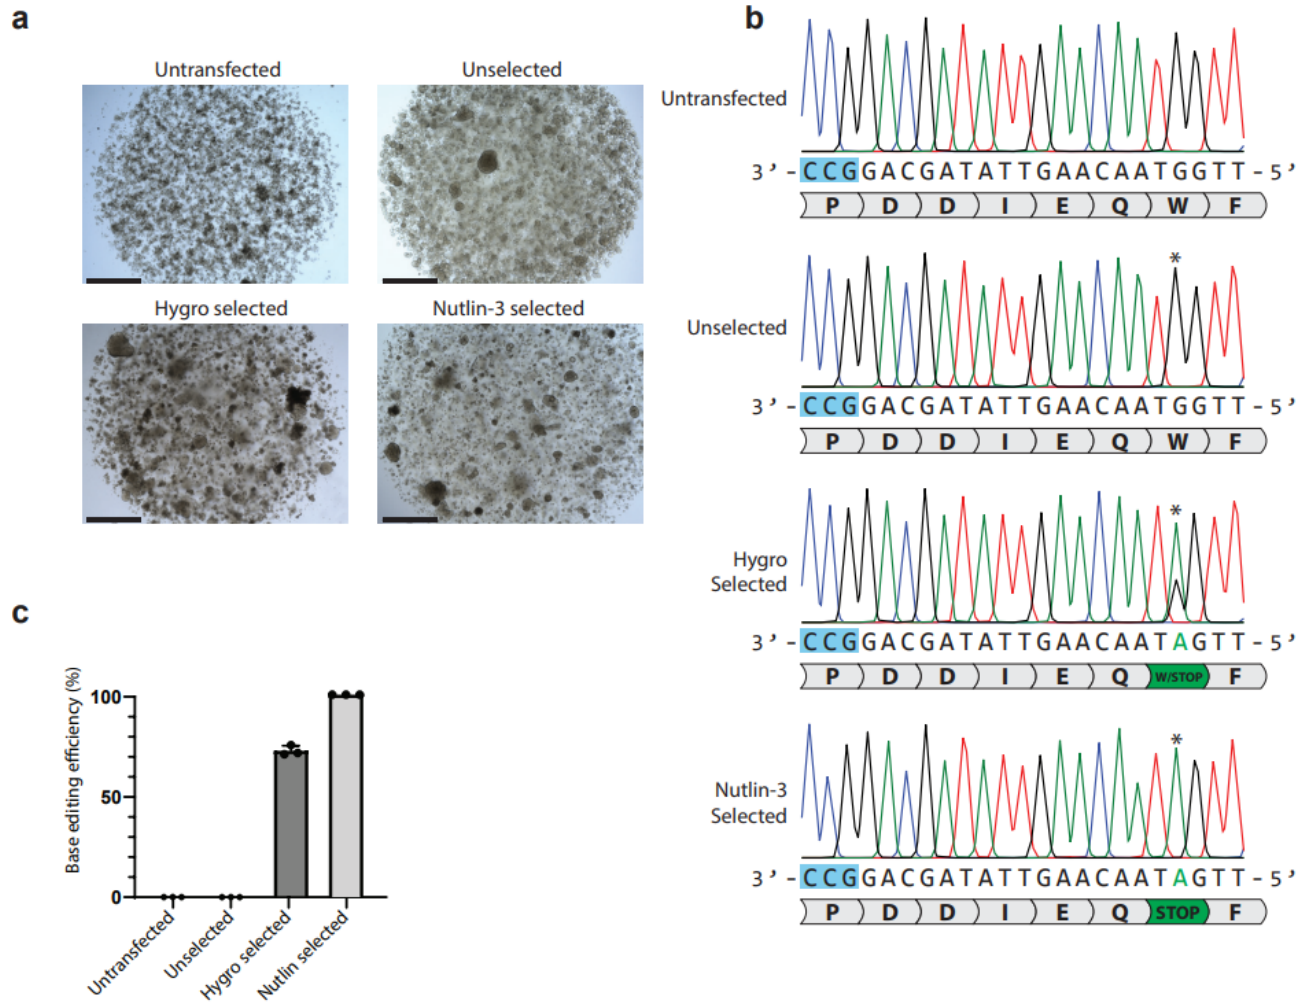

**Supplementary figure 2. Hygromycin transposon efficacy testing in fetal hepatocyte organoids.**

(a) Brightfield images showing organoids that are untransfected, unselected, hygromycin selected and Nutlin-3 selected. Organoids were transfected with CBE in combination with a *TP53*<sup>W53\*</sup> targeting sgRNA. (b) Sanger traces of bulk untransfected, unselected, hygromycin selected and Nutlin-3 selected fetal hepatocyte organoids. (c) *In silico* sanger peak quantification by Indigo. n=3 biologically independent samples. Source data are provided as a Source Data file.

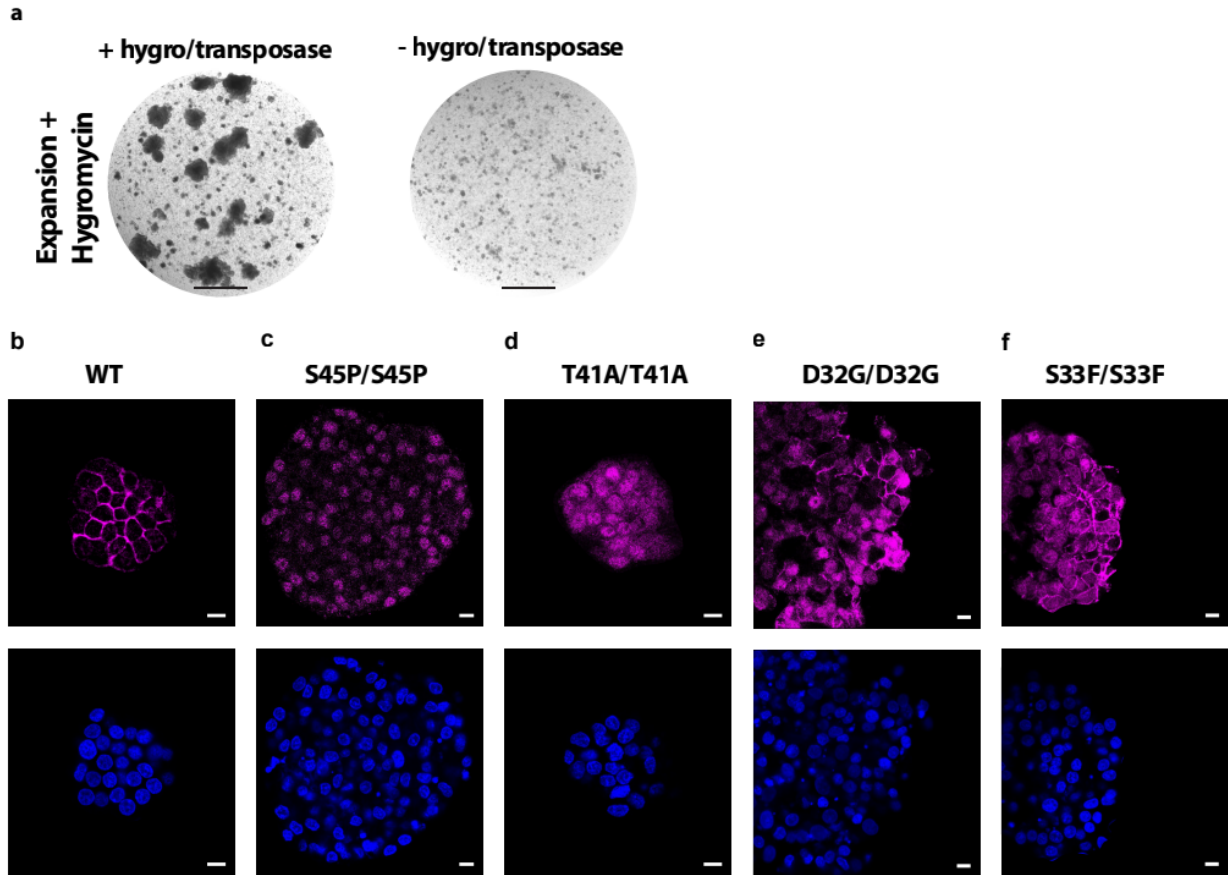

**Supplementary figure 3: BE mediated introduction of hot-spot mutations in *CTNNB1* and the impact on localization.**

(a) Brightfield images showing clonal hepatocyte organoid outgrowth upon transfection with a plasmid containing hygromycin and transposase. Whereas in control electroporations no organoid clones grow out. (b) Confocal microscopy highlighting the localization of CTNNB at the plasma membrane in WT organoids. (c) Confocal microscopy highlighting the localization of CTNNB at the plasma membrane in S45P organoids. (d) Confocal microscopy highlighting the localization of CTNNB at the plasma membrane in T41A organoids. (e) Confocal microscopy highlighting the localization of CTNNB at the plasma membrane in D32G organoids. (f) Confocal microscopy highlighting the localization of CTNNB at the plasma membrane in S33F organoids. Scale bars are 50  $\mu$ m.

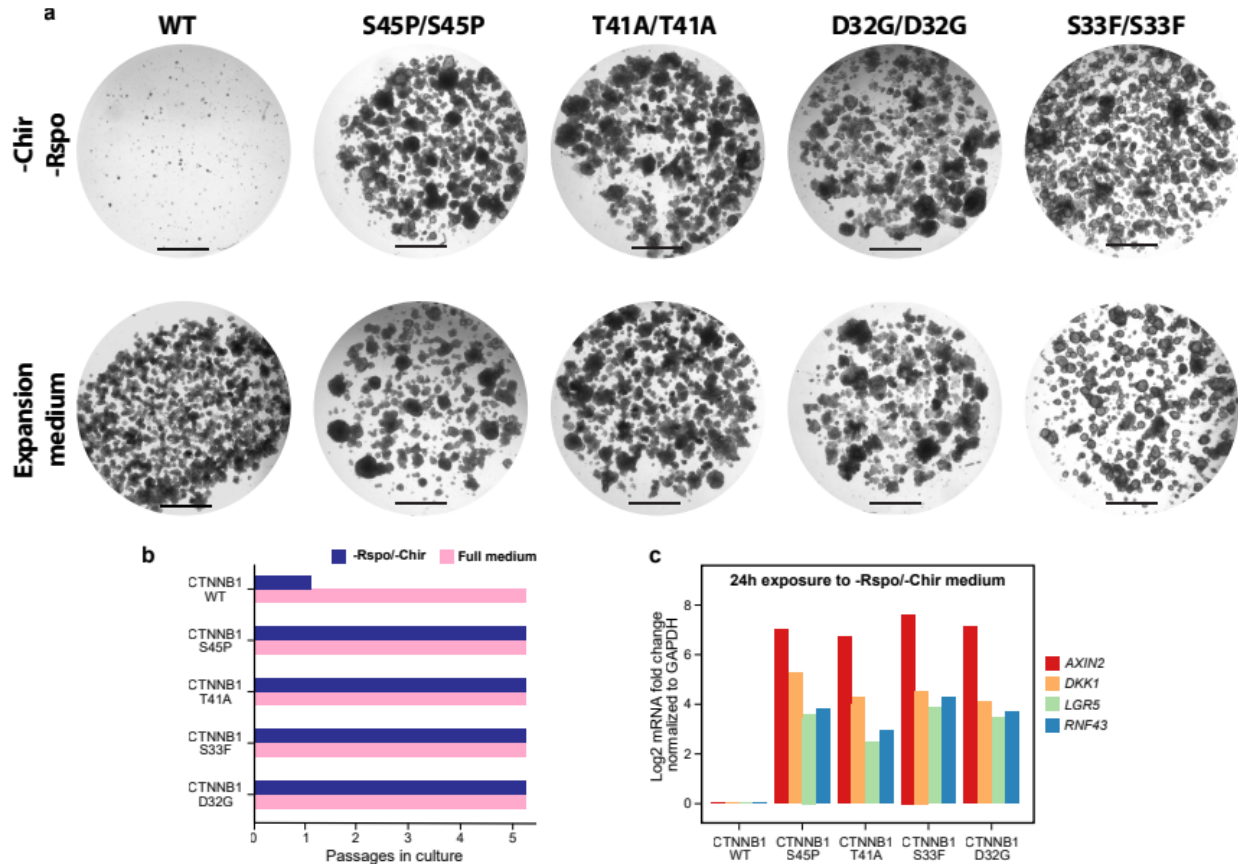

**Supplementary figure 4: BE mediated introduction of hot-spot mutations in *CTNNB1*.**

**(a)** Brightfield images showing organoid outgrowth of WT and *CTNNB1* mutant hepatocyte organoids in expansion medium or in medium that lacks Wnt-pathway components CHIR and Rspo-1. **(b)** Quantitative PCR on Wnt-pathway activation genes *AXIN2*, *DKK1*, *LGR5*, and *RNF43* shows several folds increased expression in mutant organoids when cultured in medium without Rspodin-1 and Chir. Expression levels were normalized to *GAPDH* for each condition and log-fold change was calculated relative to the wild type. **(c)** In contrast to wild type organoids, those harboring *CTNNB1* activation mutations can be maintained in culture in medium without Rspodin-1 and Chir. Source data are provided as a Source Data file.

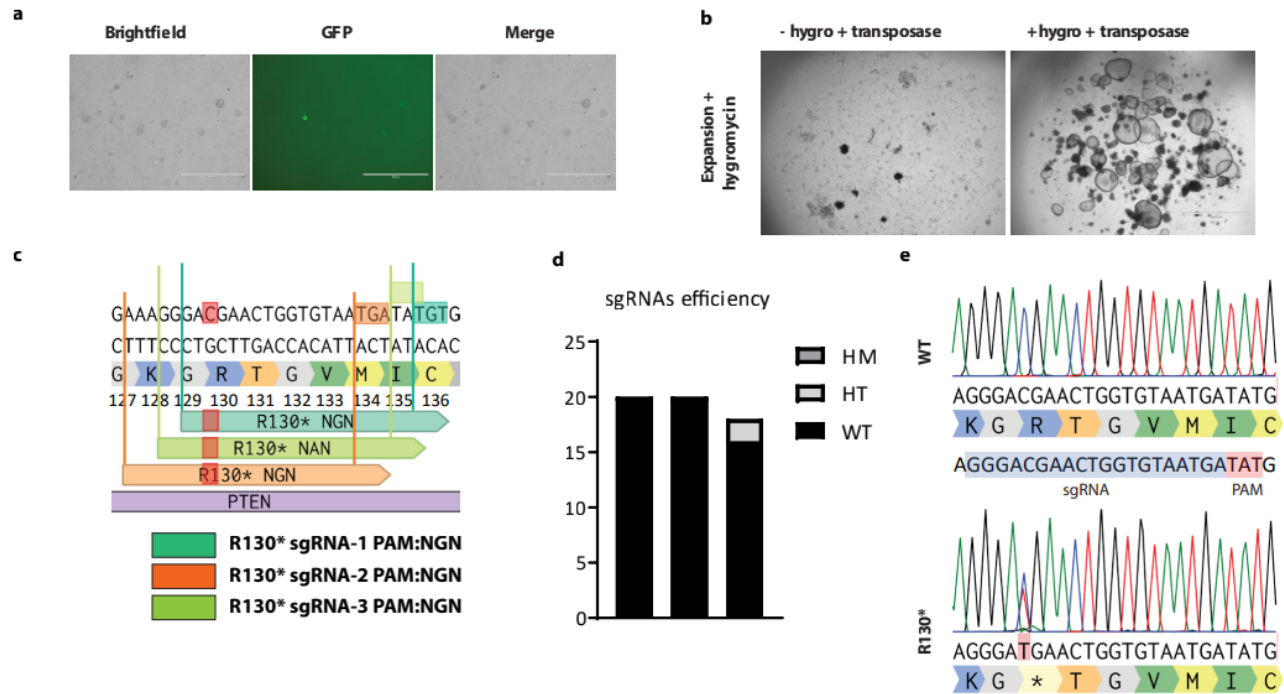

**Supplementary figure 5: BE mediated PTEN disruption results in PIK3CA pathway overactivation.**

(a) Representative pictures of human endometrial cells electroporated with the CBE carrying a GFP reporter and PTEN sgRNA plasmids. GFP<sup>+</sup> cells were detected at 24h after electroporation. Scale bar 400  $\mu$ m. (b) Representative brightfield pictures of the hygromycin selection of electroporated organoids. Hygromycin resistant clones are visible in presence of a hygromycin resistance cassette. Scale bars are 2000  $\mu$ m. (c) Sequence of the R130 locus in PTEN gene, depicting three possible sgRNA to edit the Cytosine (highlighted in red) in the Arginine (R) codon. The sgRNAs are indicated below the gene sequence while the PAM sequences for each individual guide are highlighted on the gene sequence. Different colors indicate different sgRNA and PAM combinations. (d) Bar graph reporting the efficiency of three possible sgRNAs for the PTEN R130 locus. Only the SpRY CBE resulted in efficient editing. (e) sequence alignment of the PTEN R130 locus showing successful C>T transition. The sgRNA sequence is indicated in blue while the PAM sequence is in red. Source data are provided as a Source Data file.

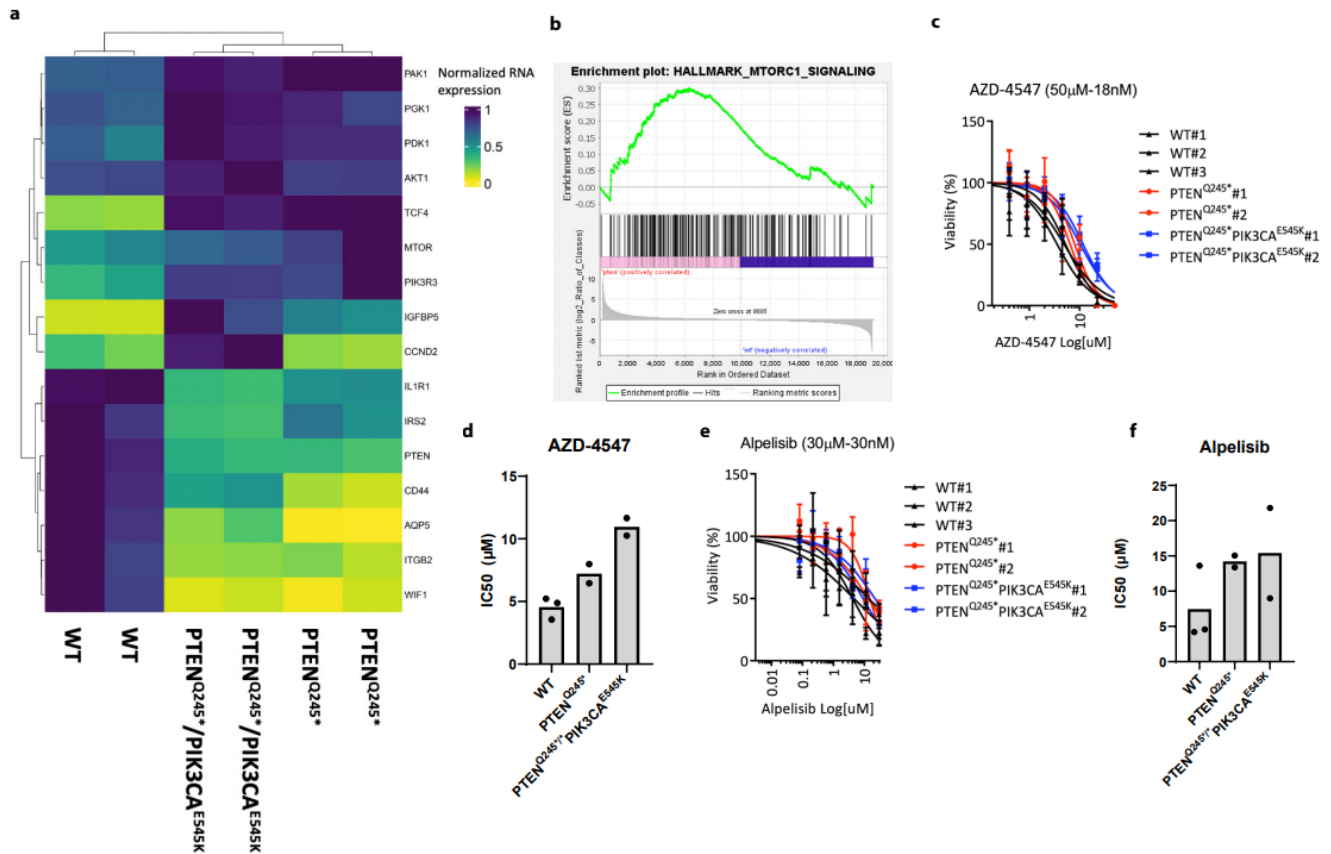

### Supplementary figure 6: RNA sequencing and drug sensitivity assays reveal PIK3CA pathway overactivation upon PTEN disruption.

(a) Heatmap showing the selected list of genes extrapolated from the RNA-sequencing analysis on WT and PTEN/PIK3CA mutant organoids, showing altered expression of target genes of the PI3K pathway. The color range represents Normalized RNA expression and ranges from 0 (low) to 1 (high). (b) GSE plot generated from the RNA-sequencing analysis describing the upregulation of mTORC1 signaling in mutant organoids. n=3 independent biological samples (c) Dose-response curve reporting the sensitivity to AZD-4547 (FGFR inhibitor) of WT and PTEN, PTEN/PIK3CA mutant organoids. The viability is indicated on the Y-axis while the inhibitor concentration is indicated on the X-axis in logarithmic scale. Both mutants show reduced sensitivity. n=3 independent biological samples. “Data are presented as mean vales +/- SD” (d) Bar graph representing the IC50 of AZD-4547 in different organoid lines, n=3 (WT), n=2  $PTEN^{Q245^*}$  and  $PTEN^{Q245^*}/PIK3CA^{E545K}$ . Statistics derived from three technical replicates per datapoint. (e) Dose-response curve reporting the sensitivity to Alpelisib (PIK3CA inhibitor) of WT and PTEN, PTEN/PIK3CA mutant organoids. The viability is indicated on the Y-axis while the inhibitor concentration is indicated on the X-axis in logarithmic scale. Both mutants show reduced sensitivity. n=3 independent biological samples. “Data are presented as mean vales +/- SD” (f) Bar graph representing the IC50 of Alpelisib in different organoid lines, n=3 (WT), n=2  $PTEN^{Q245^*}$  and  $PTEN^{Q245^*}/PIK3CA^{E545K}$ . Statistics derived from three technical replicates per datapoint. Source data are provided as a Source Data file.

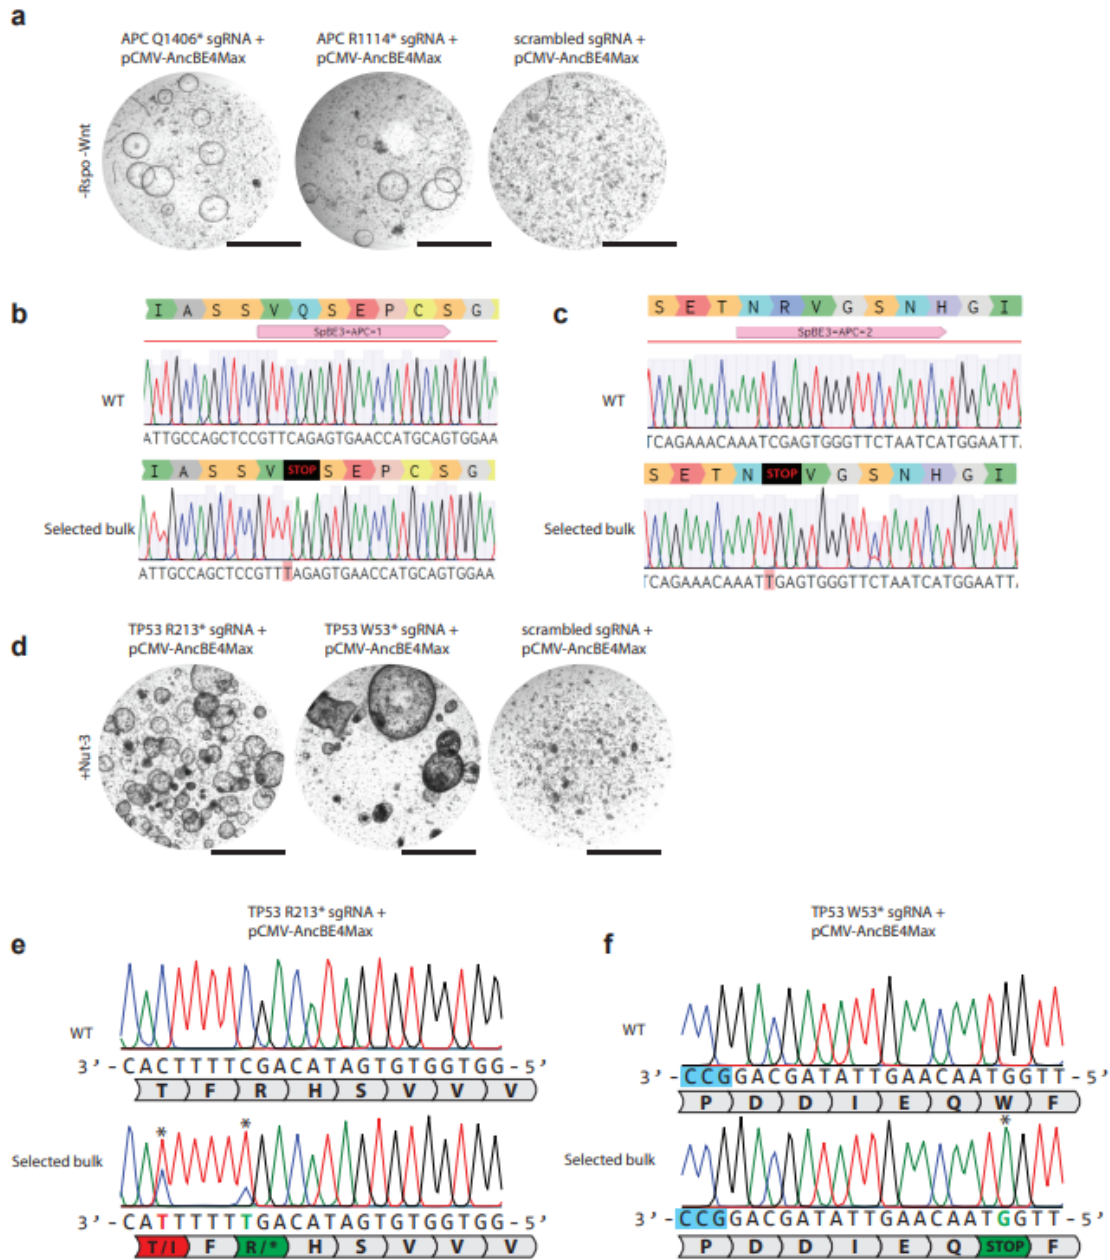

**Supplementary figure 7: Optimization of CRISPR-STOP in intestinal organoids by mutation APC and TP53**

**(a)** Brightfield images showing organoid outgrowth upon electroporation of SpCas9-CBE with *APC*<sup>Q1406\*</sup>, *APC*<sup>R1114\*</sup> or scrambled control sgRNAs. Scale bars are 2000µm **(b)** Sanger sequencing of bulk organoids upon transfection with *APC*<sup>Q1406\*</sup> sgRNA. **(c)** Sanger sequencing of bulk organoids upon transfection with *APC*<sup>R1114\*</sup> sgRNA. **(d)** Brightfield images showing organoid outgrowth upon electroporation of SpCas9-CBE with *TP53*<sup>R213\*</sup>, *TP53*<sup>W53\*</sup> or scrambled control sgRNAs. Scale bars are 2000µm **(e)** Sanger sequencing of bulk organoids upon transfection with *TP53*<sup>R213\*</sup> sgRNA. The unintended T211I mutation is highlighted in red **(f)** Sanger sequencing of bulk organoids upon transfection with *TP53*<sup>W53\*</sup> sgRNA. Source data are provided as a Source Data file.

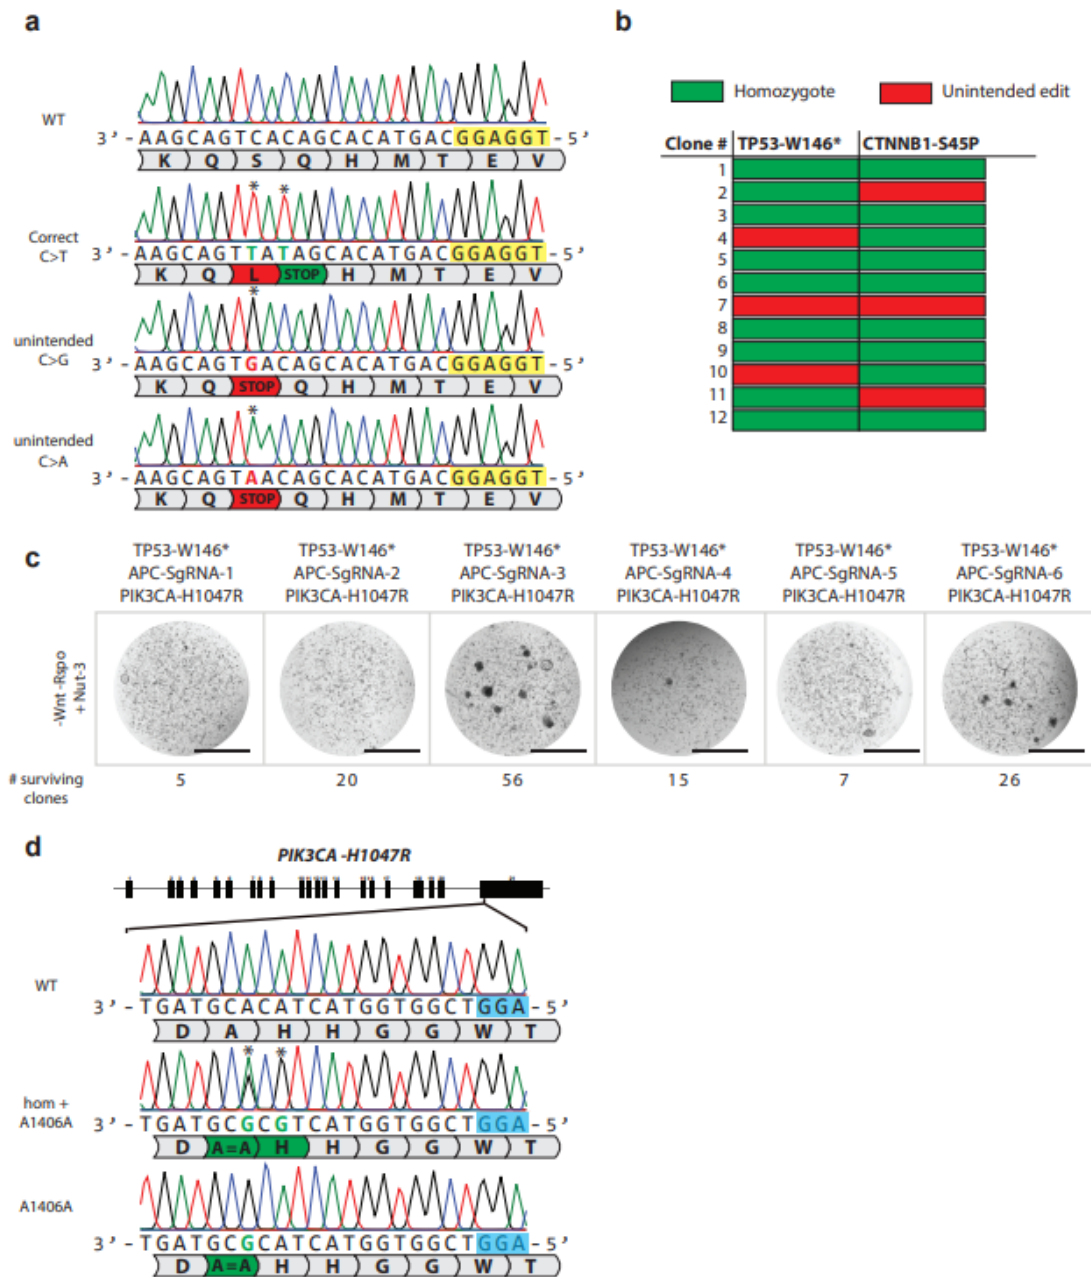

### Supplementary figure 8: Optimization of cas9 homolog base editor multiplexing

(a) sanger sequencing of organoids surviving Nutlin-3 selection upon transfection with SaKKH-CBE targeting *TP53*<sup>Q165\*</sup> showing C>T, C>A and C>G editing highlighted in red. (b) Sanger sequencing results of 12 individually picked and expanded hepatocyte clones. Green highlights homozygous edit on the locus while red highlights an unintended edit, being non-C>T base editing or indel introduction. (c) Brightfield images showing Cas9-homolog multiplexing of SaKKH-CBE targeting *TP53*<sup>W146\*</sup> and five distinct APC loci. Amount of clones that grew out after selection is shown below. Scale bars are 2000µm (d) Sanger sequencing of heterozygous and homozygous *PIK3CA*<sup>H1047R</sup> mutant organoids upon selection and clonal expansion. Source data are provided as a Source Data file.



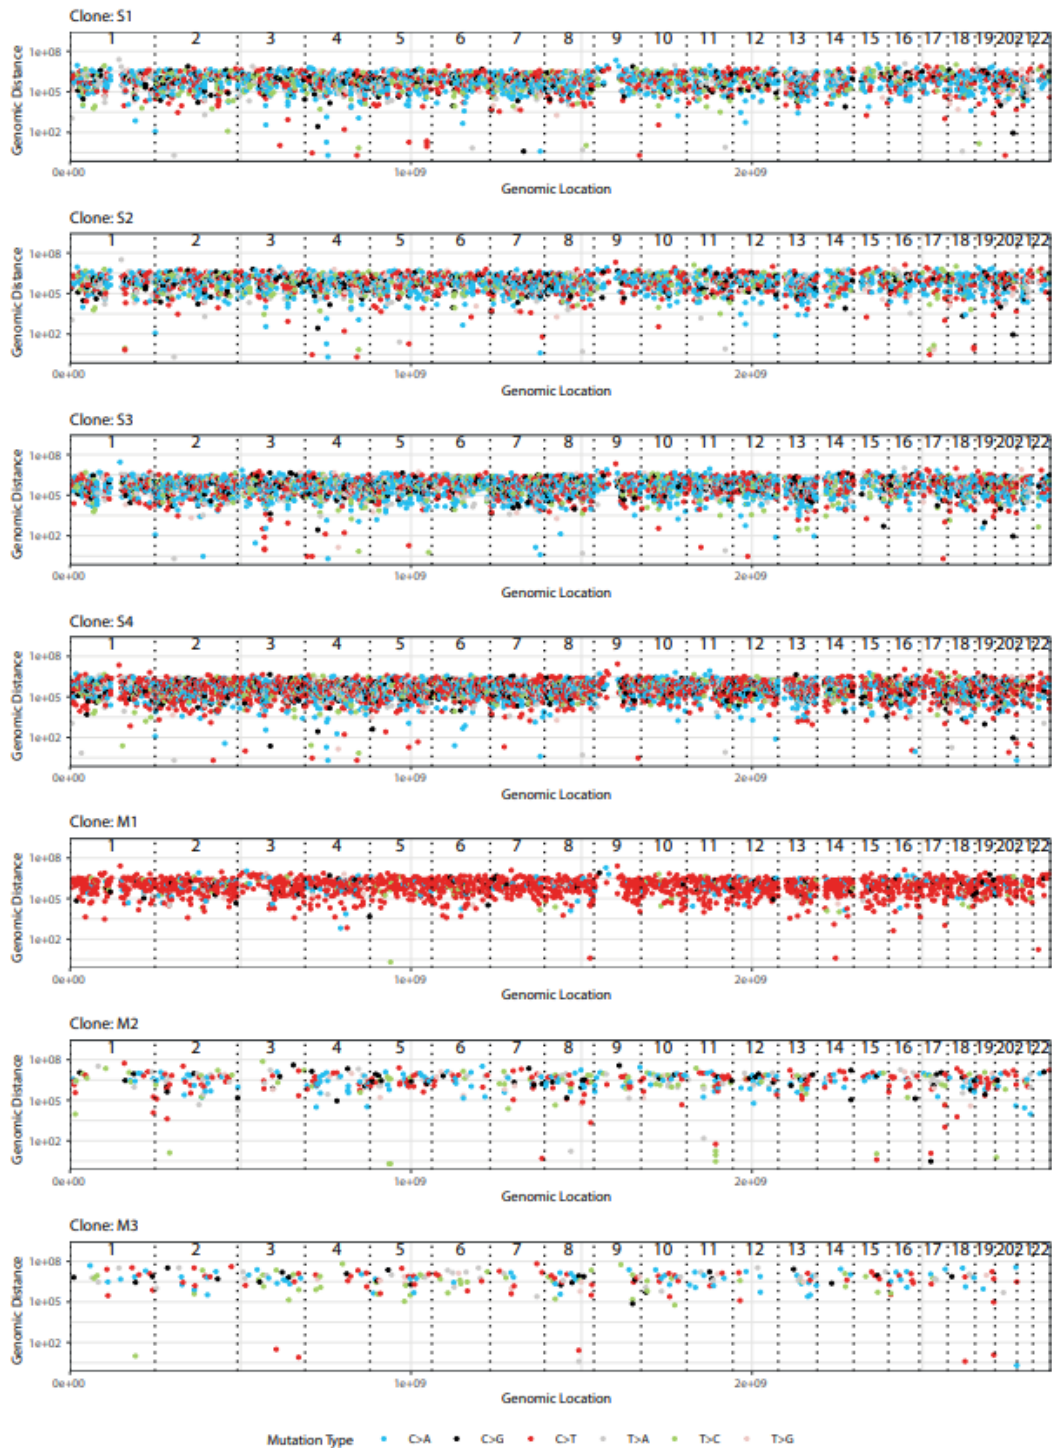

**Supplementary figure 9: Rainfall plots of multiplexed and sequentially engineered organoids.**

Every identified mutation is indicated with a dot (color according to mutation type) and is ordered on the x-axis from chromosome 1 to chromosome 22. The y-axis shows the distance between each mutation and the one before it (the genomic distance) and is plotted on a log scale

**Supplementary Table 1: Genome-wide mutational driver analysis in CBE edited organoids**

| Clone             | #CHR<br>OM | POS           | ID              | REF | AL<br>T | Mutation<br>_type    | Gene        | nuc_ch<br>ange        | aa_cha<br>nge   | Effect<br>Prediction | Tumour Types<br>(Somatic<br>(COSMIC)                                                         | ClinVar                                                               |
|-------------------|------------|---------------|-----------------|-----|---------|----------------------|-------------|-----------------------|-----------------|----------------------|----------------------------------------------------------------------------------------------|-----------------------------------------------------------------------|
| S1, S2,<br>S3, S4 | 7          | 86864<br>326  | .               | G   | T       | missense<br>_variant | GRM3        | c.2611<br>G>T         | p.Val87<br>1Phe | MODERATE             | melanoma; oral<br>SCC                                                                        | Not in<br>ClinVar                                                     |
| S1,               | 7          | 14814<br>7574 | COSM3<br>942108 | G   | T       | missense<br>_variant | CNTN<br>AP2 | c.2638<br>G>T         | p.Asp88<br>0Tyr | MODERATE             | glioma;<br>melanoma                                                                          | Not in<br>ClinVar                                                     |
| S3                | 14         | 10477<br>3538 | .               | G   | C       | missense<br>_variant | AKT1        | c.745C><br>G          | p.Arg24<br>9Gly | MODERATE             | breast;<br>colorectal;<br>ovarian; NSCLC                                                     | Not in<br>ClinVar                                                     |
| S3                | 17         | 31975<br>543  | .               | A   | G       | missense<br>_variant | SUZ1<br>2   | c.653A<br>>G          | p.Asp21<br>8Gly | MODERATE             | endometrial<br>stromal tumour                                                                | Not in<br>ClinVar                                                     |
| S3                | 17         | 76736<br>743  | .               | C   | A       | sequence<br>_feature | SRSF2       | c.326+9<br>2G>T       |                 | MODERATE             | MDS; CLL                                                                                     | Not in<br>ClinVar                                                     |
| S4                | 1          | 24151<br>7292 | .               | C   | T       | missense<br>_variant | FH          | c.157G<br>>A          | p.Glu53<br>Lys  | MODERATE             | NA                                                                                           | VCV000214<br>428.7 <br>Uncertain<br>significance<br>(Aug 27,<br>2021) |
| S4                | 19         | 14099<br>261  | .               | C   | T       | sequence<br>_feature | PRKA<br>CA  | c.420-<br>1371G><br>A |                 | MODERATE             | fibrolamellar<br>hepatocellular<br>carcinoma;<br>cortisol<br>secreting<br>adrenal<br>adenoma | Not in<br>ClinVar                                                     |

**Supplementary Table 2: sgRNA-dependent off-target effects in CBE edited organoids**

| Mutations in the targeted spacer                                                                                  |                                  |        |            |           |
|-------------------------------------------------------------------------------------------------------------------|----------------------------------|--------|------------|-----------|
| Clone                                                                                                             | Zygosity                         | gene   | Nuc change | aa change |
| M1,M2,M3                                                                                                          | hom                              | PIK3CA | c.1633G>A  | E545K     |
| M1,M2,M3                                                                                                          | hom                              | APC    | c.4216C>T  | Q1406*    |
| M1,M2,M3                                                                                                          | hom (C7), het (C18, C48)         | SMAD4  | c.1078G>A  | D360N     |
| M3                                                                                                                | het                              | SMAD4  | c.1082G>A  | R361H     |
| S1, S2, S4                                                                                                        | hom (CFP2), het (CFP4,<br>CFP11) | FBXW7  | c.1435C>T  | R479*     |
| S1, S2, S4                                                                                                        | hom (CFP2), het (CFP4,<br>CFP11) | FBXW7  | c.1433C>T  | S478F     |
| S3 and S4                                                                                                         | hom (CFP3), het (CFP4)           | FBXW7  | c.1513C>T  | R505C     |
| S3 and S4                                                                                                         | hom (CFP3), het (CFP4)           | FBXW7  | c.1512C>T  | V504V     |
| <i>The following mutations are filtered out by GATK 'SnpCluster' Filter, but present in the following clones:</i> |                                  |        |            |           |
| M3, S1, S2, S4                                                                                                    | het                              | TP53   | c.159G>A   | W53*      |
| M1, M3, S1, S2, S3,<br>S4                                                                                         | hom                              | TP53   | c.148G>A   | W53*      |
| S2, S4                                                                                                            | het (CFP4), hom (CFP2)           | TP53   | c.151G>A   | G51K      |

| Mutation in predicted off-target spacer regions (up to 4 mismatches allowed) |     |        |                    |          |
|------------------------------------------------------------------------------|-----|--------|--------------------|----------|
| Clone                                                                        |     |        |                    |          |
| M1                                                                           | het | HDAC9  | c.25+126487C>T     | intronic |
| M1                                                                           | het | HDAC9  | c.25+126488C>T     | intronic |
| 200bp window (targeted)                                                      |     |        |                    |          |
| Clone                                                                        |     |        |                    |          |
| M3                                                                           | het | PIK3CA | c.1641G>A          | E547E    |
| 200bp window (off-targets)                                                   |     |        |                    |          |
| Clone                                                                        |     |        |                    |          |
| M1                                                                           | het | N/A    | G>A<br>5.180391501 | N/A      |

**Supplementary Table 3: Primers used for sgRNA construction**

| Primer name         | Primer sequence                              |
|---------------------|----------------------------------------------|
| universal_SpCas9_FW | /5Phos/GTTTTAGAGCTAGAAATAGCAAGTTAAAATAAGGC   |
| universal_SaCas9_FW | /5Phos/GTTTTAGTACTCTGTAATGAAAATTACAG         |
| CTNNB1_S45P_NGG     | CTACCACAGCTCCTTCTCTGcgggtgttcgtcctttccacaag  |
| CTNNB1_T41A_NGA     | GAGAAGGAGCTGTGGTAGTGcgggtgttcgtcctttccacaag  |
| CTNNB1_D32S33_NGG   | GAATGGATTCCAGAGTCCAGCggtgttcgtcctttccacaag   |
| PTEN_R130*_TGT      | TATCATTACACCAGTTCGTCCcgggtgttcgtcctttccacaag |
| PTEN_R130*_TGA      | TTACACCAGTTCGTCCCTTTcgggtgttcgtcctttccacaag  |
| PTEN_R130*_TAT      | TCATTACACCAGTTCGTCCCCcgggtgttcgtcctttccacaag |
| PTEN_Q245*_TGG      | CACACAGGTAACGGCTGAGGCcgggtgttcgtcctttccacaag |
| APC_Q1406*_NGG      | CTGCATGGTTCACTCTGAACcgggtgttcgtcctttccacaag  |
| APC_R1114*_NGG      | TGATTAGAACCACTCGATTcgggtgttcgtcctttccacaag   |
| TP53_R213*_NGG      | CCACACTATGTCGAAAAGTGcgggtgttcgtcctttccacaag  |
| TP53_W53*_NGG       | GACGATATTGAACAATGGTTcgggtgttcgtcctttccacaag  |
| PIK3CA_E545K_NGG    | CTCTCTGAAATCACTGAGCACggtgttcgtcctttccacaag   |
| PIK3CA_H1047R_NGN   | AGCCACCATGATGTGCATCAcgggtgttcgtcctttccacaag  |
| SMAD4_R361H_NGG     | TTCTGGAGGAGATCGCTTTcgggtgttcgtcctttccacaag   |
| SaKKH_TP53_1_Q317*  | TGGTTTCTCTTTGGCTGGGcgggtgttcgtcctttccacaag   |
| SaKKH_TP53_2_W146*  | CCTGTGCAGCTGTGGGTTGAcgggtgttcgtcctttccacaag  |
| SaKKH_TP53_3_Q165*  | GTCATGTGCTGTGACTGCTTcgggtgttcgtcctttccacaag  |
| SaKKH_TP53_4_Q52*   | GTCTTCAGTGAACCATTGTTcgggtgttcgtcctttccacaag  |
| SaKKH_TP53_5_Q38*   | TCATCCATTGCTTGGGACGGcgggtgttcgtcctttccacaag  |
| SaKKH_APC_1_R1114*  | TGATTAGAACCACTCGATTcgggtgttcgtcctttccacaag   |
| SaKKH_APC_2_Q1406*  | CTGCATGGTTCACTCTGAACcgggtgttcgtcctttccacaag  |
| SaKKH_APC_3_Q1127*  | TTGACACAAAGACTGGCTTAcgggtgttcgtcctttccacaag  |

|                    |                                            |
|--------------------|--------------------------------------------|
| SaKKH_APC_4_R805*  | TATCATCATGTCGATTGGTGcggtgttctgcctttccacaag |
| SaKKH_APC_5_Q1291* | TTCCTGTGTCGTCTGATTACcggtgttctgcctttccacaag |
| SaKKH_APC_6_Q1294* | AGAATCTGCTCCTGTGTCGcggtgttctgcctttccacaag  |
| FBXW7_R479*_NGG    | AAGAGTGGCATCTCGAGAACcggtgttctgcctttccacaag |

**Supplementary Table 4: Primers used for genotyping by PCR and subsequent sanger sequencing**

| Locus            | FW                        | Rev                      | Seq                       |
|------------------|---------------------------|--------------------------|---------------------------|
| PTEN R130        | TGCTACCAGTCCGTATAGCGT     | TTCCAGGGACTGAGGGTGG      | TCTGAGGTTATCTTTTACCACAGT  |
| PTEN Q245        | TCTGCCACTAGAAGTCTAATTTTGG | GCCTTTTCTTCAAACAGGATTATT | TCTGCCACTAGAAGTCTAATTTTGG |
| CTNNB1 Exon3     | TGATGGAGTTGGACATGGCCAT    | GTAGATGGGATCTGCATGCCCT   | GTAGATGGGATCTGCATGCCCT    |
| APC Q1406*       | TCTTCAGAATCAGCCAGGCACA    | CTGGAAGAACCTGGACCCTCTG   | AGTGTACAGCACCCCTAGAACC    |
| APC R1114*       | AGCAGTTGAACTCTGGAAGGCA    | GGCTGATCCACATGACGTTTCT   | GGCTGATCCACATGACGTTTCT    |
| TP53 R213*       | TGATTGCTCTTAGGTCTGGCCC    | ACTGACAACCACCTTAACCCC    | TGGCCATCTACAAGCAGTCACA    |
| TP53 W53*        | CACCCATCTACAGTCCCCTTG     | TGACAGGAAGCCAAAGGGTGAA   | CTTGGCTGTCCAGAATGCAAG     |
| PIK3CA_E545K     | ATCATCTGTGAATCCAGAGGGGA   | AGTGTCTGTGTGGGAGAAACAA   | TGCATGCTGTTCAAAGGTTGACA   |
| SMAD4 R361H      | AAACTGTGTTGTGGAGTGCAAG    | AAAAACACCGACAATTAAGATGGA | TGGAGTGCAAGTAAAGCCTTA     |
| TP53 W146 + Q165 | CTGAGGTGTAGACGCCAACT      | GACAACCACCTTAACCCCTC     | TTAACCCCTCTCCAGAGA        |
| PIK3CA_H1047R    | CTCCAAACTGACCAAAGTGTCT    | CTAATGCTGTTTATGGATTGTGC  | TTCTATGCAATCGGCTTTGCC     |

**Supplementary Table 5: QPCR primers used in this study**

| Gene   | Fwd                     | Rev                     |
|--------|-------------------------|-------------------------|
| AKT    | TGCTTTTCAAGGGCTGCTCAAG  | ACCTGGTGTGAGTCTCCGAC    |
| AXIN2  | AGTGTGAGGTCCACGGAAAC    | CTGGTGCAAAGACATAGCCA    |
| DKK1   | GGTATTCCAGAAGAACCACCTTG | CTTGGACCAGAAGTGTCTAGCAC |
| LGR5   | TATGCCTTTGAAACCTCTC     | CACCATTCAGAGTCAGTGTT    |
| mTORC1 | GCAGATTTGCCAACTATCTTCGG | CAGCGGTAAAAGTGTCCCTG    |
| PTEN   | GCCGTCAAATCCAGAGGCTA    | GGATCAGAGTCAGTGGTGTCA   |
| RNF43  | GTGTGTGCCATCTGTCTGGA    | CGATGGAACCTCATGGAGGCA   |
| ZRNF3  | GGACCCGAAACCATGCCTC     | TCTGCACCCCTTACATACACC   |
| ACTB   | CCTCGCCTTTGCCGATCC      | GGTGAGGATGCCTCTCTTGC    |
| GAPDH  | GTCTCCTCTGACTTCAACAGCG  | ACCACCTGTTGCTGTAGCCAA   |
